# Supplementary material for: Nutrigenomics as a tool to study the impact of diet on aging and age-related diseases: the Drosophila approach
Source: PubMed Central journal article supplement (PMC6498619; doi:10.1186/s12263-019-0638-6), 2019-05-02
Supplement: 12263_2019_638_MOESM1_ESM.pdf [file 12263_2019_638_MOESM1_ESM.pdf]

Supplemental Table S1. List of genes

| Fly genes*                                          |                                 |                    |                                                                          |
|-----------------------------------------------------|---------------------------------|--------------------|--------------------------------------------------------------------------|
| Name                                                | Symbol                          | Also known as      | Flybase Description                                                      |
| Adipokinetic hormone                                | Akh                             |                    |                                                                          |
| Adipokinetic hormone receptor                       | AkhR                            |                    |                                                                          |
| Akt1                                                | Akt1                            |                    | AKT serine/threonine protein 1**                                         |
| AMP-activated protein kinase $\alpha$ subunit       | AMPK $\alpha$                   | AMPK               |                                                                          |
| Autophagy-related 8a                                | Atg8a                           |                    |                                                                          |
| cap-n-collar isoform-C                              | cncC                            | Nrf2               |                                                                          |
| Catalase                                            | Cat                             |                    |                                                                          |
| chico                                               | chico                           |                    | insulin receptor substrate**                                             |
| DJ-1a                                               | DJ-1a                           |                    |                                                                          |
| DJ-1b                                               | DJ-1b                           |                    |                                                                          |
| forkhead box, sub-group O                           | foxo                            | dFOXO              |                                                                          |
| Heat shock protein 22                               | Hsp22                           |                    |                                                                          |
| Heat shock protein 68                               | Hsp68                           |                    |                                                                          |
| Heat shock protein 70                               | Hsp70A or Hsp70B                |                    |                                                                          |
| I'm not dead yet                                    | Indy                            |                    |                                                                          |
| Insulin-like peptide 1                              | Iip1                            |                    |                                                                          |
| Insulin-like peptide 2                              | Iip2                            |                    |                                                                          |
| Insulin-like peptide 3                              | Iip3                            |                    |                                                                          |
| Insulin-like peptide 4                              | Iip4                            |                    |                                                                          |
| Insulin-like peptide 5                              | Iip5                            |                    |                                                                          |
| Insulin-like peptide 6                              | Iip6                            |                    |                                                                          |
| Insulin-like peptide 7                              | Iip7                            |                    |                                                                          |
| Insulin-like peptide 8                              | Iip8                            |                    |                                                                          |
| Insulin-like receptor                               | InR                             |                    |                                                                          |
| lethal (2) essential for life                       | l(2)efl                         |                    |                                                                          |
| Leucine-rich repeat kinase                          | Lrrk                            | LRRK2              |                                                                          |
| methuselah                                          | mth                             |                    |                                                                          |
| Phosphoenolpyruvate carboxykinase                   | Pepck 1 or Pepck 2 <sup>#</sup> |                    | phosphoenolpyruvate carboxykinase 2, mitochondrial**                     |
| Pi3K21B                                             | Pi3K21B                         | PI3K               | phosphatidylinositol-4,5-bisphosphate 3-kinase catalytic subunit alpha** |
| Regulatory particle non-ATPase 11                   | Rpn11                           |                    |                                                                          |
| Ribosomal protein S6 kinase                         | S6k                             | dS6K               |                                                                          |
| shaggy                                              | sgg                             | GSK3               |                                                                          |
| sirtuin 1                                           | Sirt1                           | Sir2               |                                                                          |
| spargel                                             | srl                             | PGC-1              |                                                                          |
| Superoxide dismutase 1                              | Sod1                            |                    |                                                                          |
| Superoxide dismutase 2                              | Sod2                            |                    |                                                                          |
| Target of rapamycin                                 | Tor                             |                    |                                                                          |
| thioredoxin peroxidase 1                            | Jafrac1                         |                    |                                                                          |
| Thor                                                | Thor                            | 4E-BP <sup>s</sup> |                                                                          |
| transactive response DNA-binding protein-43 homolog | TBPH                            | TDP-43             |                                                                          |
| unpaired 2                                          | upd2                            |                    |                                                                          |

| Human genes**                      |        |               |  |
|------------------------------------|--------|---------------|--|
| Name                               | Symbol | Also known as |  |
| amyloid beta precursor protein     | APP    |               |  |
| beta-secretase 1                   | BACE1  |               |  |
| synuclein alpha                    | SNCA   | h- $\alpha$ S |  |
| microtubule associated protein tau | MAPT   | tau           |  |

\* flybase.org

# best score\_ortholog in FlyBase

<sup>s</sup> Thor is a eukaryotic translation initiation factor 4E binding protein (flybase.org description); 4E-binding serine/threonine protein 1 (uniprot.org).

\*\* HUGO- genenames.org
